# Supplementary material for: Genetic Variations in the Transforming Growth Factor-β1 Pathway May Improve Predictive Power for Overall Survival in Non-small Cell Lung Cancer
Source: PubMed Central journal article supplement (PMC8294034; doi:10.3389/fonc.2021.599719), 2021-07-07
Supplement: Data_Sheet_1.pdf [file Data_Sheet_1.pdf]

Based on 96 stage 3 patients with chemotherapy

| Factors            | HR (95%CI)        | P-value       |
|--------------------|-------------------|---------------|
| Gender             |                   |               |
| Male               |                   |               |
| Female             | 0.45 (0.25,0.86)  | <b>0.014</b>  |
| Ethnicity          |                   |               |
| Caucasian          |                   |               |
| No Caucasian       | 1.2 (0.30,5.02)   | 0.78          |
| Smoking            |                   |               |
| No smoking         |                   |               |
| Former smoker      | 253 (0,Inf)       | 0.99          |
| Smoker             | 277 (0,Inf)       | 0.99          |
| Histology          |                   |               |
| Adenocarcinoma (1) |                   |               |
| Squamous (2)       | 2.41 (1.14, 5.08) | <b>0.021</b>  |
| Other (3)          | 2.96 (1.47,5.99)  | <b>0.0025</b> |
| Age                | 1.02 (0.99,1.04)  | 0.114         |
| KPS                | 1.00 (0.98,1.009) | 0.54          |
| EQD2               | 0.95 (0.94,0.99)  | <b>0.0014</b> |

**HR: hazard ratio.**

| SNPs       | HR for the minor allele (95%CI) | P-value        |
|------------|---------------------------------|----------------|
| rs235756   | 0.63 (0.37,1.07)                | 0.087          |
| rs1424954  | 1.06 (0.47,2.38)                | 0.89           |
| rs3857979  | 0.89 (0.50,1.59)                | 0.70           |
| rs4760259  | 0.94 (0.45, 1.97)               | 0.87           |
| rs4776342  | 0.55 (0.34,0.91)                | <b>0.020</b>   |
| rs4803455  | 1.77 (0.97,3.23)                | 0.06           |
| rs6494633  | 0.95 (0.53,1.70)                | 0.86           |
| rs7227023  | 1.16 (0.16,8.40)                | 0.88           |
| rs7333607  | 10.9 (3.10,38.47)               | <b>0.00020</b> |
| rs11724777 | 0.93 (0.54,1.62)                | 0.80           |
| rs11939979 | 1.01 (0.54,1.89)                | 0.97           |
| rs12102171 | 0.45 (0.27,0.74)                | <b>0.0018</b>  |
| rs12456284 | 0.61 (0.38,0.98)                | <b>0.041</b>   |
| rs12913975 | 0.76 (0.35,1.67)                | 0.50           |
| rs235756   | 2.1 (0.76,5.82)                 | 0.15           |

**HR: hazard ratio.**
